# Supplementary material for: Characterization of menstrual stem cells: angiogenic effect, migration and hematopoietic stem cell support in comparison with bone marrow mesenchymal stem cells
Source: PubMed Central journal article supplement (PMC4404686; doi:10.1186/s13287-015-0013-5), 2015-03-17
Supplement: 13287_2015_13_MOESM2_ESM.pdf [file 13287_2015_13_MOESM2_ESM.pdf]

## Additional File 2

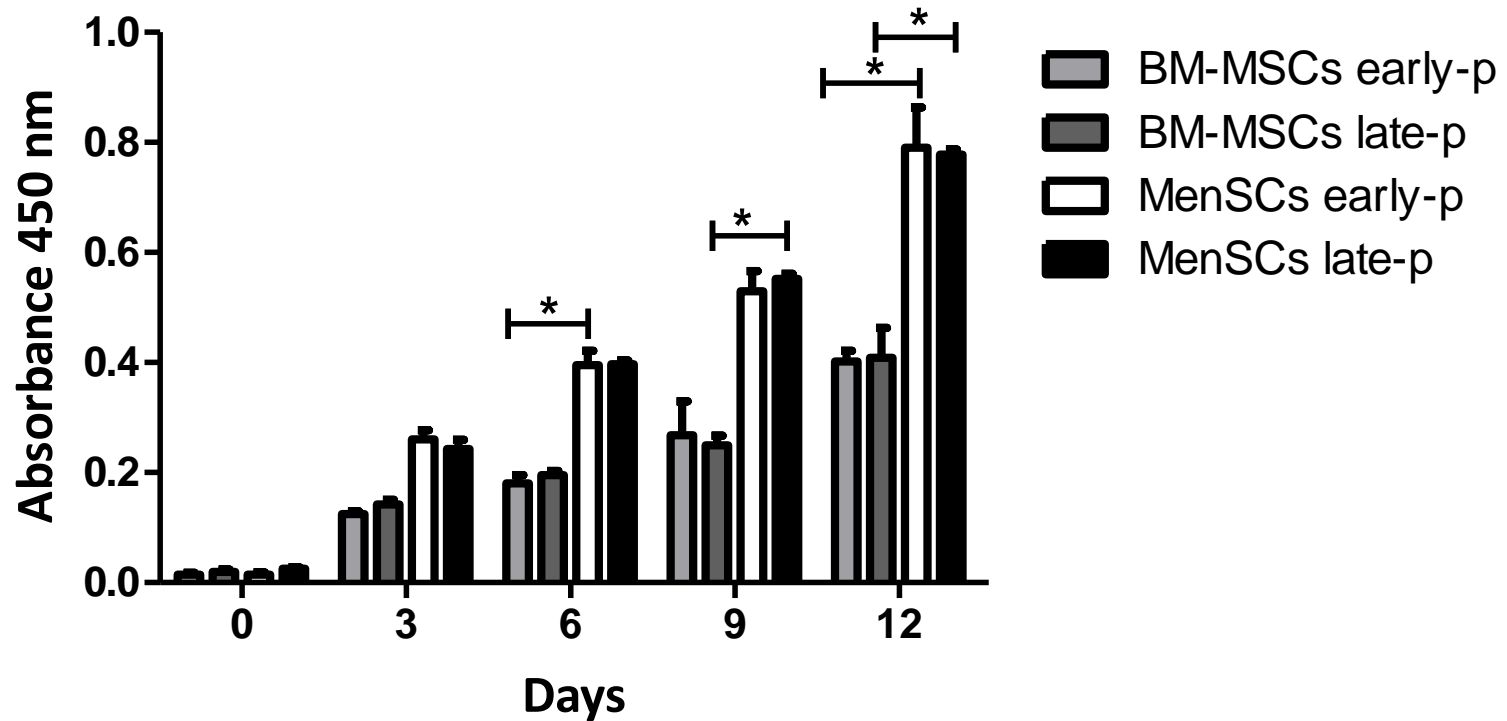

**Figure S2. MenSCs show a stable proliferation rate over long-term cultures.** In order to evaluate the stability of the MenSCs and BM-MSCs proliferation in long-term cultures, proliferation assays were performed at early (P3-6) and late (P12-14) culture passages. No statistical differences were observed when comparing cell proliferation at early versus late passages in both MSCs sources.
