# Supplementary material for: Characterization of menstrual stem cells: angiogenic effect, migration and hematopoietic stem cell support in comparison with bone marrow mesenchymal stem cells
Source: PubMed Central journal article supplement (PMC4404686; doi:10.1186/s13287-015-0013-5), 2015-03-17
Supplement: 13287_2015_13_MOESM3_ESM.pdf [file 13287_2015_13_MOESM3_ESM.pdf]

## Additional File 3

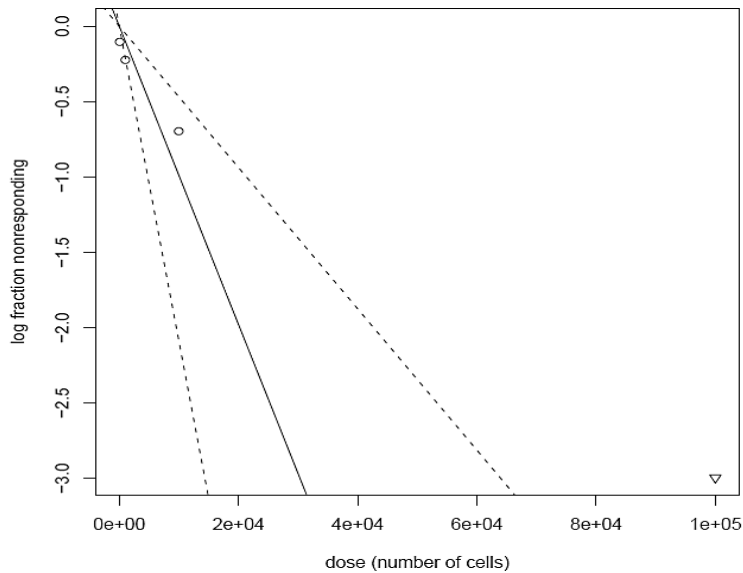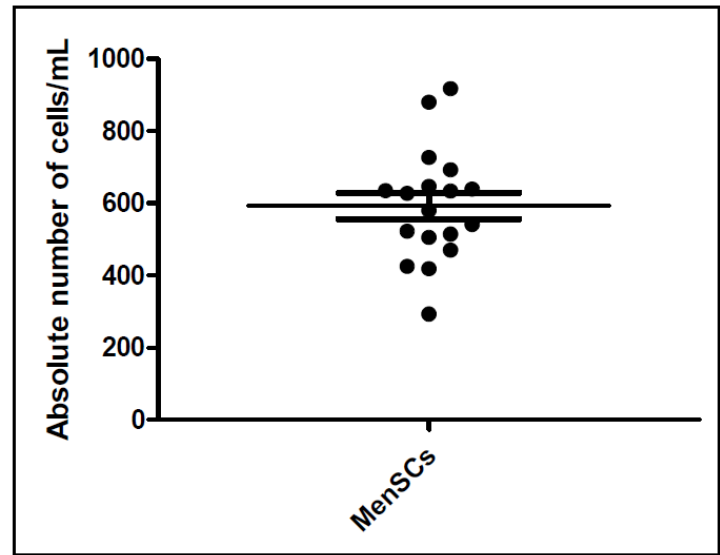

**Figure S3. Limiting dilution analysis of MenSCs define the frequency of progenitors cells.** Mononuclear cells obtained after the ficoll centrifugation of the menstrual blood were resuspended in DMEM and plated at a density of 100; 1,000; 10,000, and 100,000 nucleated cells/cm<sup>2</sup>. Media were changed the next day to wash non adherent cells. The frequency of progenitors was calculated by counting the number of CFU-F in each determined dilution and following the Extreme limiting dilution analysis (ELDA) method for comparing depleted and enriched populations in stem cells. The absolute number of progenitor cells/ml of menstrual blood was obtained by multiplying the frequency of progenitors with the number of total of mononuclear cells isolated from 1 ml of menstrual blood post-Ficoll isolation.
