# Supplementary material for: Characterization of menstrual stem cells: angiogenic effect, migration and hematopoietic stem cell support in comparison with bone marrow mesenchymal stem cells
Source: PubMed Central journal article supplement (PMC4404686; doi:10.1186/s13287-015-0013-5), 2015-03-17
Supplement: 13287_2015_13_MOESM5_ESM.pdf [file 13287_2015_13_MOESM5_ESM.pdf]

## Additional File 5

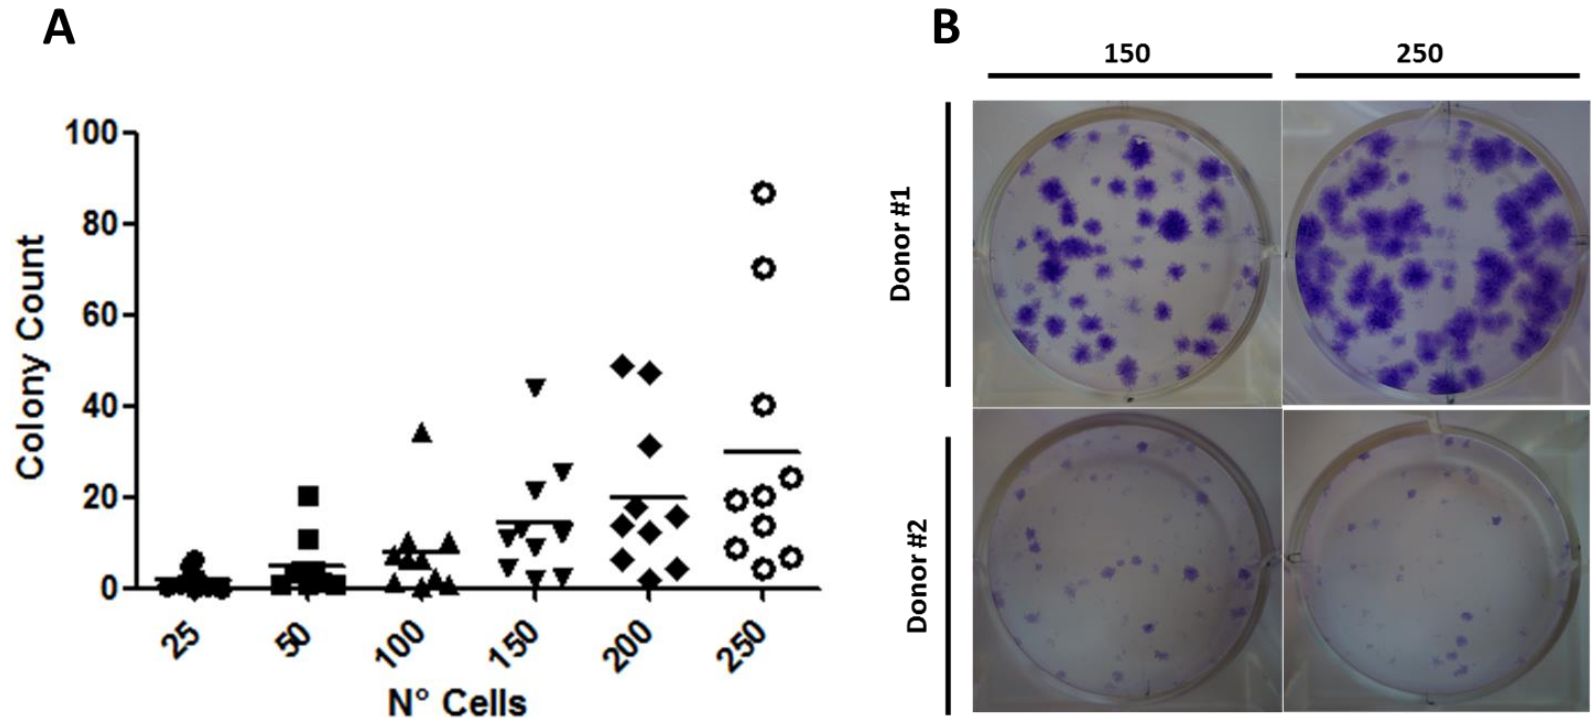

**Figure S5. MenSCs present variability in their properties donor dependent.** Ten samples from different donors were isolated and serial dilutions of a defined number of cells were cultured and their potential for the formation of CFU was evaluated. **(A) Total number of CFU colony;** **(B) Representative images of CFU colony.**
